# Supplementary material
Source: publisher figshare collection journal article supplement (https://acs.figshare.com/ndownloader/files/7546627)
Supplement: Supplementary file 1 [file 7546627]

## Supporting Information

### **Lissoclibadin 1, a Polysulfur Aromatic Alkaloid from the Indonesian Ascidian *Lissoclinum* cf. *badium*, Induces Caspase-dependent Apoptosis in Human Colon Cancer Cells and Suppresses Tumor Growth in Nude Mice**

Takeo Tatsuta,<sup>‡</sup> Masahiro Hosono,<sup>\*,‡</sup> Henki Rotinsulu,<sup>†,§</sup> Defny S. Wewengkang,<sup>†,§</sup>  
Deiske A. Sumilat,<sup>†,⊥</sup> Michio Namikoshi,<sup>†</sup> and Hiroyuki Yamazaki<sup>\*,†</sup>

<sup>†</sup>Department of Natural Product Chemistry, Faculty of Pharmaceutical Sciences and <sup>‡</sup>Division of Cell Recognition Study, Institute of Molecular Biomembrane and Glycobiology, Tohoku Medical and Pharmaceutical University, Aoba-ku, Sendai 981-8558, Japan.

<sup>§</sup>Faculty of Mathematic and Natural Sciences and <sup>⊥</sup>Faculty of Fisheries and Marine Science, Sam Ratulangi University, Kampus Bahu, Manado 95115, Indonesia.

## **Contents**

**Figure S1.** Effects of lissoclibadin 1 (**1**) against four human cancer cell lines: HCT-15, HeLa-S3, MCF-7, and NCI-H28.

Each cell line ( $5 \times 10^4$  cells/mL) was precultured for 24 h, and compound **1** in DMSO or DMSO alone (final conc. 0.1%) was added at the indicated concentrations for 24 h. Cells were observed using a light microscope.

**Figure S2.** Effects of pan-caspase, caspase-8, and caspase-9 inhibitors on morphological changes of HCT-15 cells induced by lissoclibadin 1 (**1**)

HCT-15 cells ( $5 \times 10^4$  cells/mL) were precultured for 24 h in 1 mL. Each caspase inhibitor was added at 50  $\mu$ M and incubated for 30 min. Lissoclibadin 1 in DMSO (5.0  $\mu$ M) or DMSO alone (final conc. 0.1%) was then added and the cells were incubated for the indicated time. Cell morphology was observed using a light microscope.

**Figure S3.** HCT-15 tumor-bearing nude mice administered solvent (vehicle control) (left), 25 mg/kg of lissoclibadin 1 (**1**) (middle), and 25 mg/kg of irinotecan (right). Pictures were taken on Day 20.

**Figure S4.**  $^1\text{H}$  NMR spectrum of lissoclibadin 1 (**1**).

**Figure S5.**  $^1\text{H}$  NMR spectrum of lissoclibadin 3 (**2**).

**Figure S6.**  $^1\text{H}$  NMR spectrum of lissoclibadin 4 (**3**).

**Figure S7.**  $^1\text{H}$  NMR spectrum of lissoclibadin 7 (**4**).

**Figure S8.**  $^1\text{H}$  NMR spectrum of lissoclibadin 8 (**5**).

**Figure S9.**  $^1\text{H}$  NMR spectrum of lissoclibadin 14 (**6**).

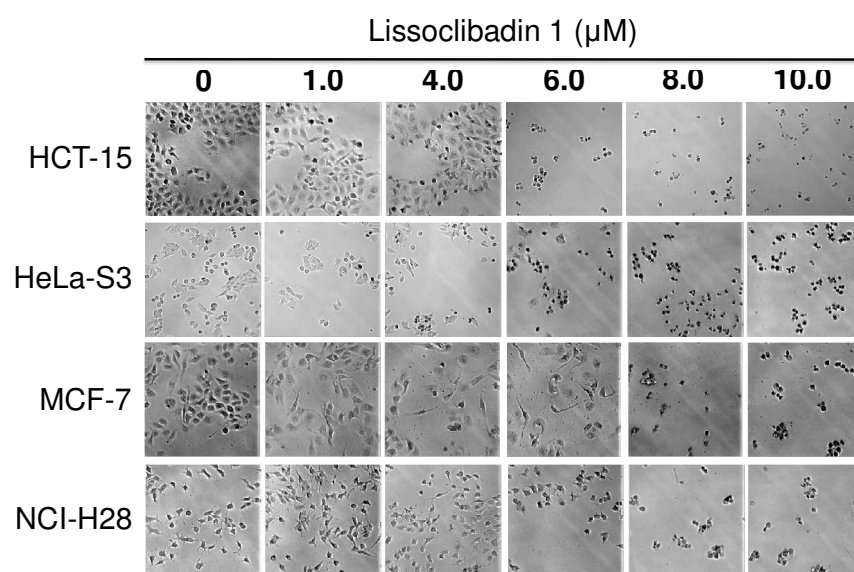

**Figure S1**

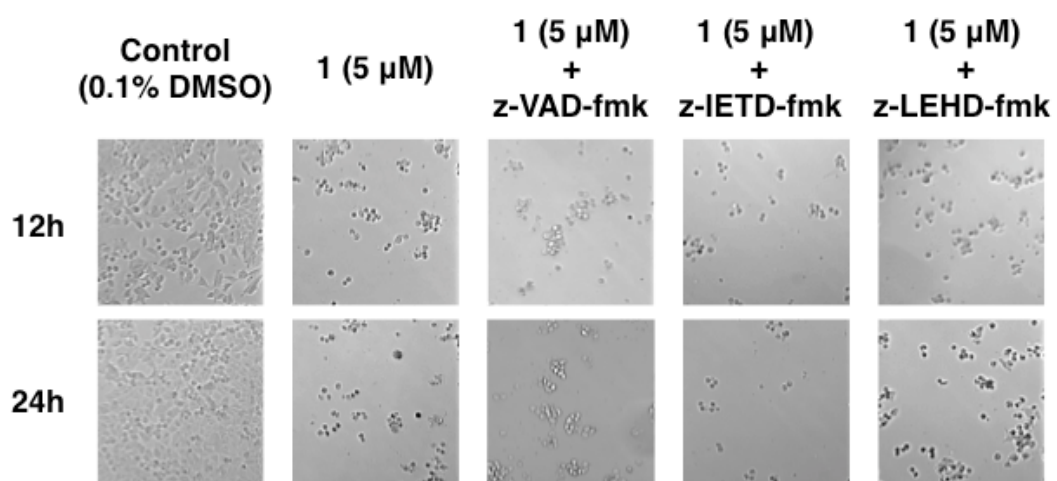

**Figure S2**

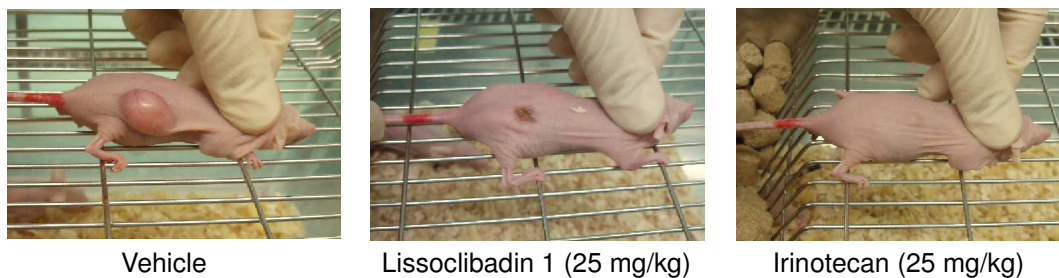

**Figure S3**

**Table S1. Average Tumor Volume For Each Treatment Group At Day 0, 24, and 28**

| Day | Tumor volume (mm <sup>3</sup> ) |                         |                             |                              |
|-----|---------------------------------|-------------------------|-----------------------------|------------------------------|
|     | Vehicle                         | Irinotecan<br>(25mg/kg) | Lissoclibadin 1<br>(5mg/kg) | Lissoclibadin 1<br>(25mg/kg) |
| 0   | 58.51 ± 12.18                   | 56.06 ± 8.937           | 56.63 ± 5.387               | 56.54 ± 14.07                |
| 14  | 713.4 ± 164.8                   | 57.82 ± 15.64           | 719.2 ± 218.1               | 218.5 ± 89.45                |
| 28  | 1512 ± 299.3                    | 141.1 ± 87.53           | 1780 ± 516.8                | 638.7 ± 566.5                |

The tumor-bearing mice were injected intratumorally with one dose of irinotecan and two doses of lissoclibadin 1. Tumor volume was calculated as following formula: length (mm) × width (mm) × depth (mm) ×  $\pi/6$ . Each value indicates the mean ± SD (n = 6).

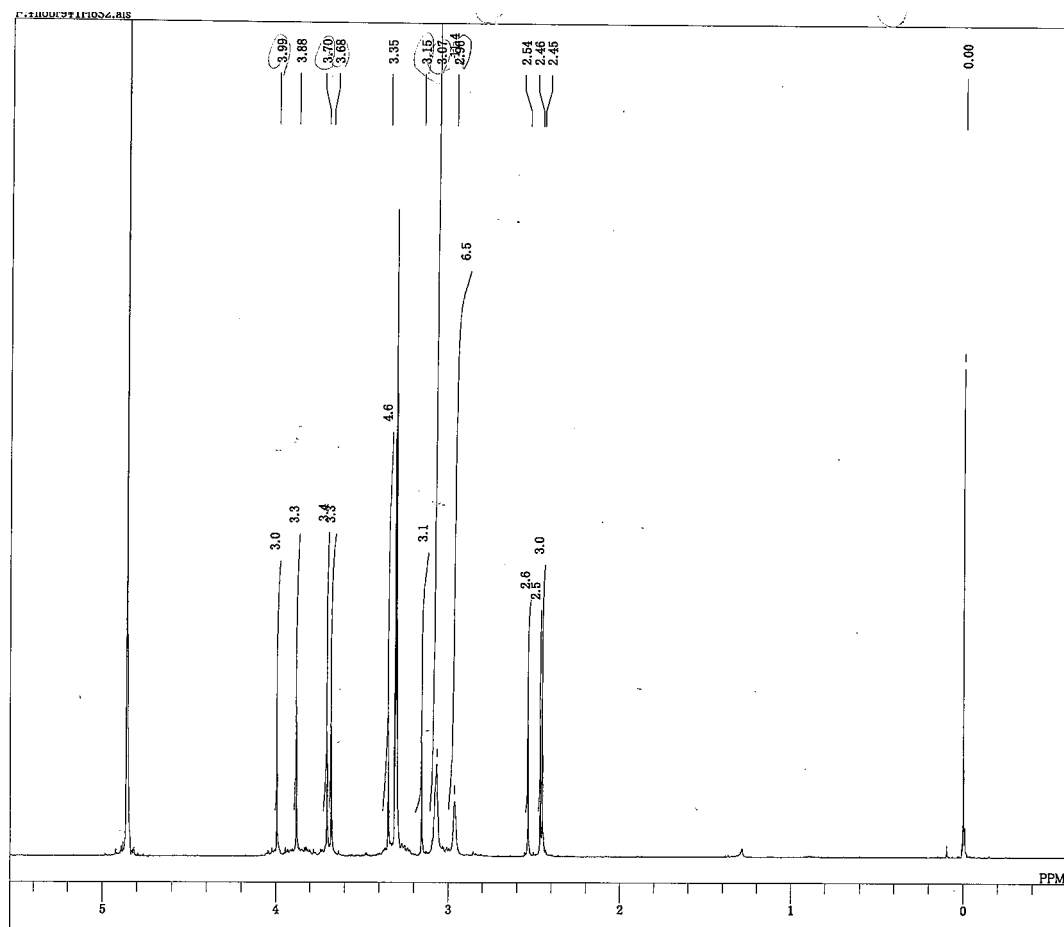

Figure S4

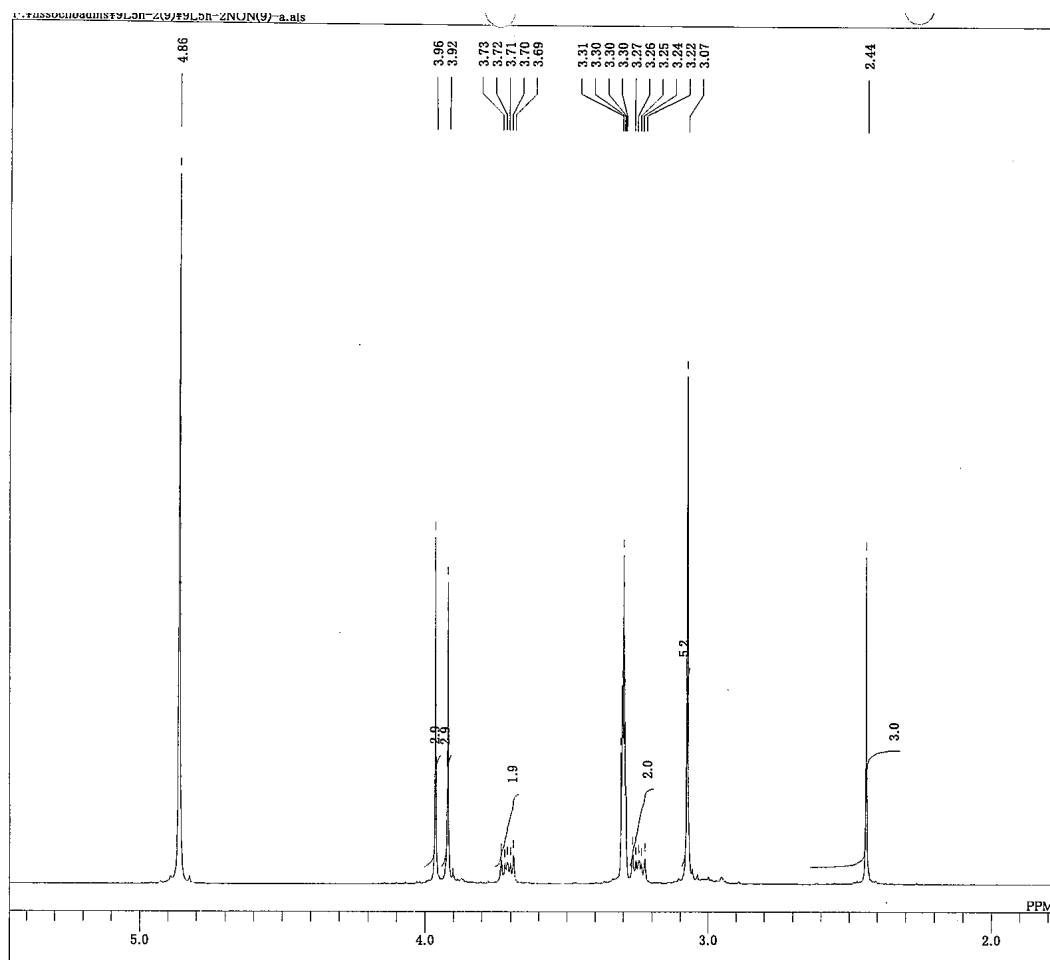

Figure S5

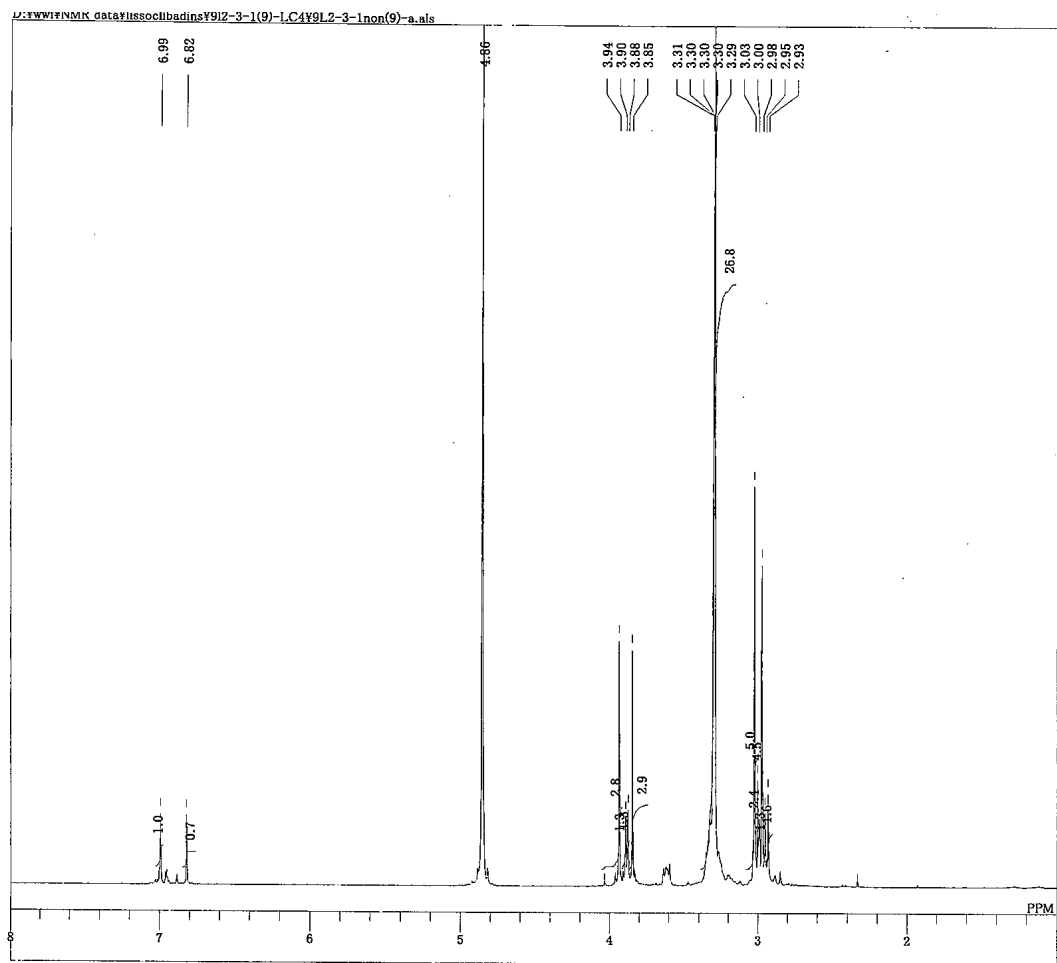

Figure S6

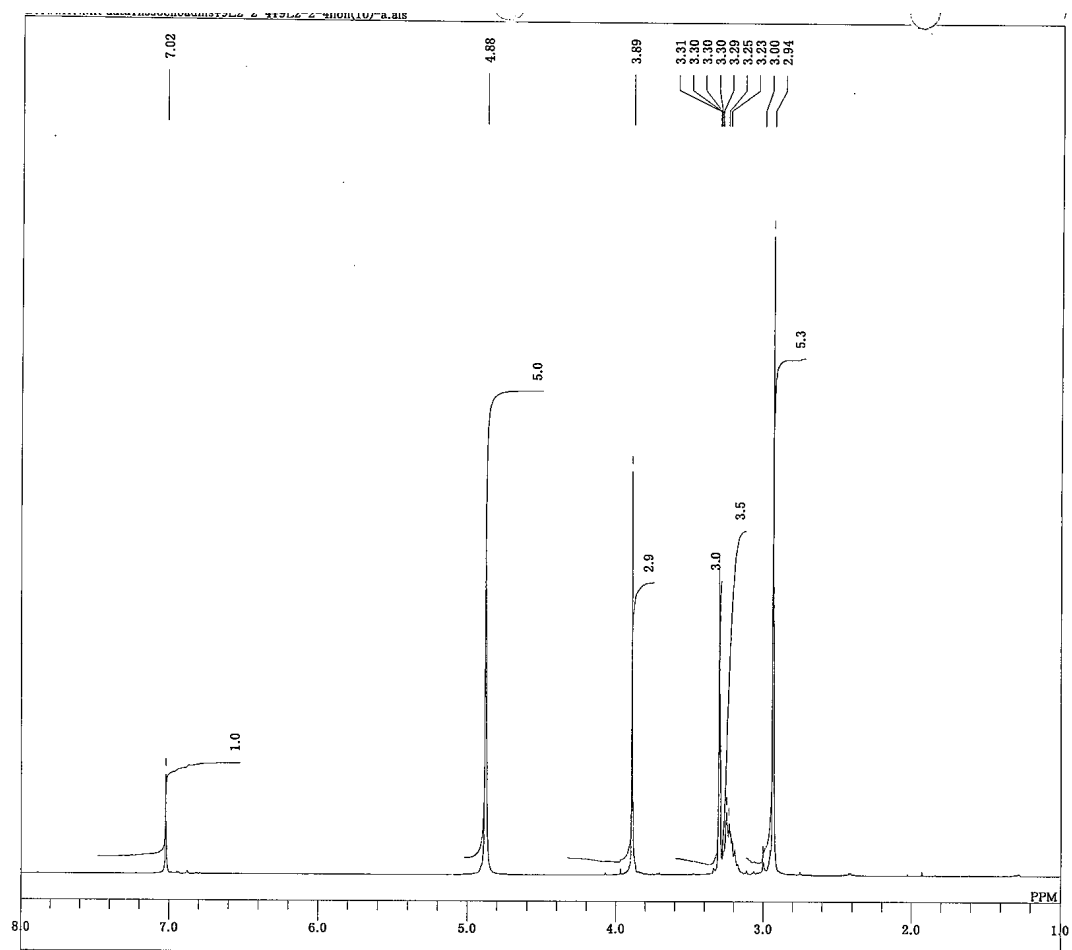

Figure S7



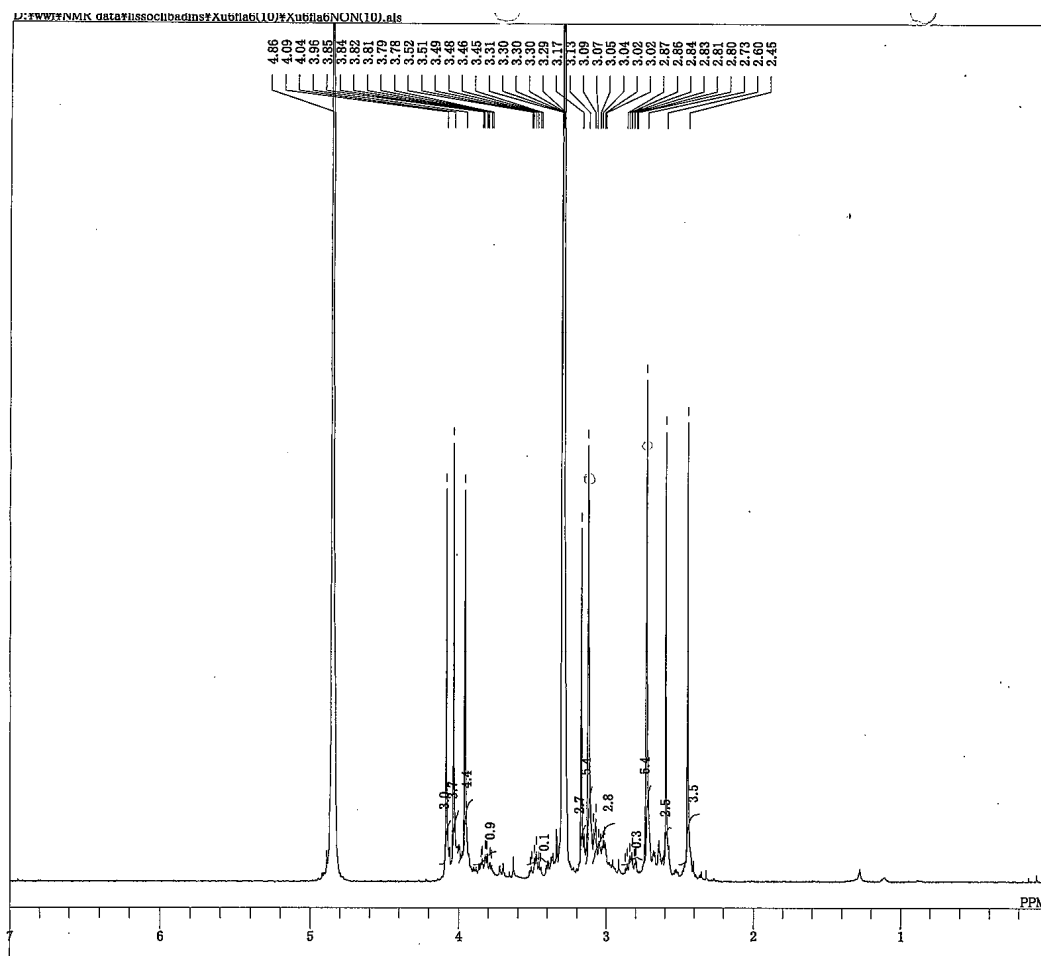

Figure S8

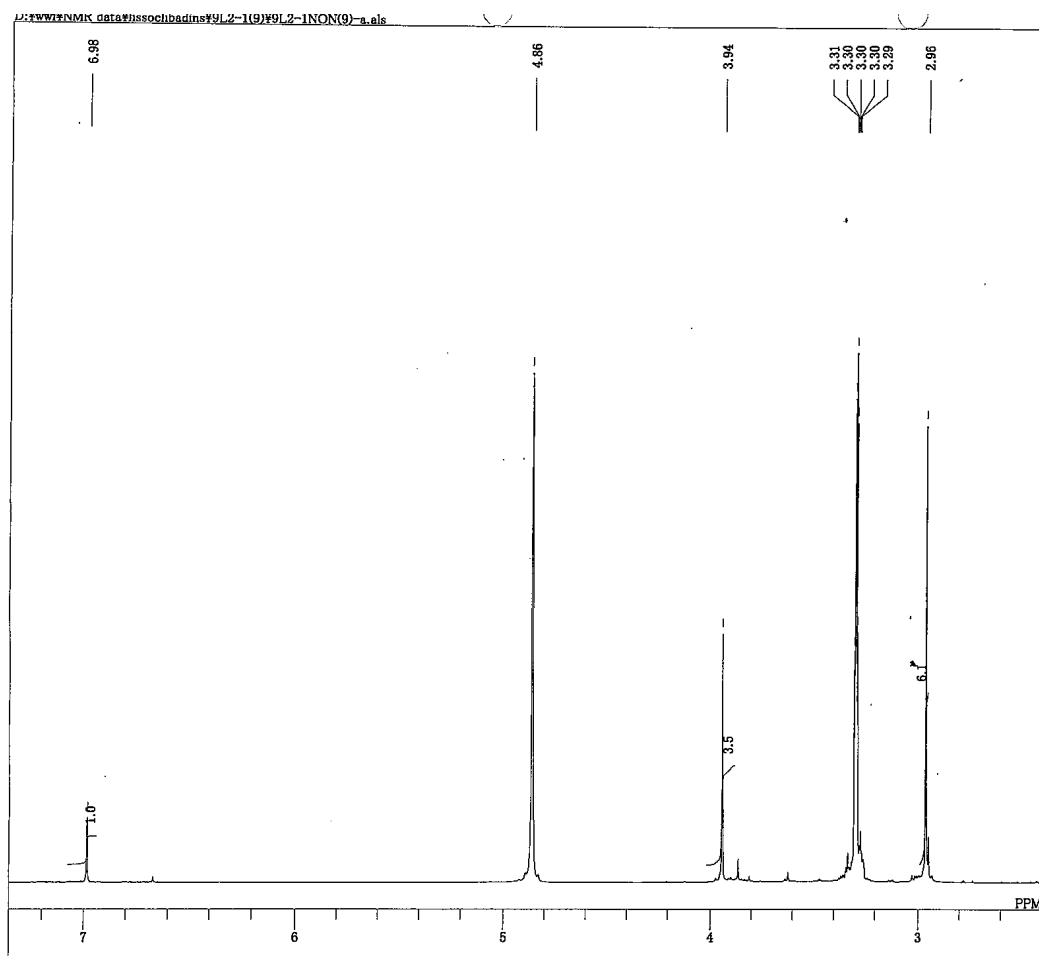

Figure S9
